# Supplementary material for: Does Drug-Resistant Extrapulmonary Tuberculosis Hinder TB Elimination Plans? A Case from Delhi, India
Source: PubMed Central journal article supplement (PMC7558170; doi:10.3390/tropicalmed5030109), 2020-07-01
Supplement: tropicalmed-05-00109-s001.pdf [file tropicalmed-05-00109-s001.pdf]

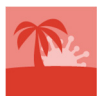

Supplementary

# Does Drug-Resistant Extrapulmonary Tuberculosis Hinder TB Elimination Plans? A Case from Delhi, India

Sheelu Lohiya <sup>1,\*</sup>, Jaya Prasad Tripathy <sup>2</sup>, Karuna Sagili <sup>3</sup>, Vishal Khanna <sup>1</sup>, Ravinder <sup>4</sup>, Arun Ojha <sup>1</sup>, Anuj Bhatnagar <sup>5</sup> and Ashwani Khanna <sup>1</sup>

<sup>1</sup> Lok Nayak Hospital, New Delhi 110002, India; dr.vishalkhanna@rediffmail.com (V.K.); dpsdllnc@rntcp.org (A.O.); stodl@rntcp.org (A.K.)

<sup>2</sup> All India Institute of Medical Sciences, Nagpur 441108, India; ijay.doc@gmail.com

<sup>3</sup> International Union Against Tuberculosis and Lung Disease, The Union South East Asia Office, New Delhi 110016, India; KSagili@theunion.org

<sup>4</sup> All India Institute of Medical Sciences, New Delhi 110029, India; dpsdIndm@rntcp.org

<sup>5</sup> Rajan Babu Institute of Pulmonary Medicine and Tuberculosis, New Delhi 110009 India; dpsdlkcc@rntcp.org

\* Correspondence: dtodllnc@rntcp.org

Received: 11 March 2020; Accepted: 28 May 2020; Published: date

**Table S1.** Socio-demographic and clinical factors associated with unfavorable treatment outcome among drug resistant extra-pulmonary TB cases in Delhi aged < 15 years, 2016.

|                         | Variables  | Treatment Outcome |                  |        | RR<br>(95% CI) | p value |
|-------------------------|------------|-------------------|------------------|--------|----------------|---------|
|                         |            | Total<br>N        | Unfavorable<br>n | %      |                |         |
| Sex                     | Male       | 21                | 5                | (23.8) | 1.0 (0.4–2.7)  | 0.9     |
|                         | Female     | 29                | 7                | (24.1) |                |         |
| Weight (in Kilograms)   | < 30       | 36                | 7                | (19.4) | 1.8 (0.7–4.8)  | 0.3     |
|                         | 31–50      | 14                | 5                | (35.7) |                |         |
| DR-TB Centre            | Centre 1   | 15                | 1                | (6.7)  | 3.6 (0.5–27.5) | 0.3     |
|                         | Centre 2   | 21                | 5                | (23.8) |                |         |
|                         | Centre3    | 14                | 6                | (42.9) |                |         |
| Site of disease         | Others     | 22                | 3                | (13.6) | 0.4 (0.2–1.4)  | 0.13    |
|                         | Lymph node | 28                | 9                | (32.1) |                |         |
| Basis of diagnosis      | Others     | 5                 | 0                | (0.0)  | --             | 0.32    |
|                         | CBNAAT     | 45                | 12               | (26.7) |                |         |
| History of previous TB  | Yes        | 40                | 11               | (27.5) | 2.7 (0.4–18.9) | 0.24    |
|                         | No         | 10                | 1                | (10.0) |                |         |
| HIV status              | Negative   | 48                | 11               | (22.9) | 1.0            | 0.4     |
|                         | Positive   | 2                 | 1                | (50.0) |                |         |
| Severe adverse reaction | Yes        | 7                 | 1                | (14.3) | 0.6 (0.2–3.7)  | 0.5     |
|                         | No         | 43                | 11               | (25.6) |                |         |

RR: Relative Risk; DR-TB: Drug Resistant Tuberculosis; CBNAAT: Cartridge Based Nucleic Amplification Test; HIV: Human Immunodeficiency Virus.

**Table S2.** Socio-demographic and clinical factors associated with unfavorable treatment outcome among drug resistant extra-pulmonary TB cases in Delhi aged ≥15 years, 2016.

|             | Variables   | Treatment Outcome |                  |        | RR<br>(95% CI) | p value |
|-------------|-------------|-------------------|------------------|--------|----------------|---------|
|             |             | Total<br>N        | Unfavorable<br>n | %      |                |         |
| Sex         | Male        | 71                | 30               | (42.3) | 1.3 (0.9–1.9)  | 0.2     |
|             | Female      | 82                | 27               | (32.9) |                |         |
| Age (years) | 15–44 years | 147               | 52               | (35.4) | 1.0            |         |

|                                |            |     |    |        |                |      |
|--------------------------------|------------|-----|----|--------|----------------|------|
|                                | > 45 years | 6   | 5  | (83.3) | 2.4 (1.6–3.6)  | 0.02 |
| <b>Weight (in Kilograms)</b>   | < 30       | 5   | 1  | (20.0) | 1.0            |      |
|                                | 31–50      | 79  | 32 | (40.5) | 2.0 (0.3–12.0) | 0.6  |
|                                | Above 50   | 69  | 24 | (34.8) | 1.7 (0.3–10.0) | 0.6  |
| <b>DR-TB Centre</b>            | Centre 1   | 44  | 15 | (34.1) | 1.0            |      |
|                                | Centre 2   | 67  | 32 | (47.8) | 1.4 (0.9–2.3)  | 0.1  |
|                                | Centre 3   | 42  | 10 | (23.8) | 1.4 (0.7–2.8)  | 0.8  |
| <b>Site of disease</b>         | Others     | 82  | 35 | (42.7) | 1.4 (0.9–2.1)  | 0.1  |
|                                | Lymph node | 71  | 22 | (31.0) | 1.0            |      |
| <b>Basis of diagnosis</b>      | Others     | 25  | 10 | (40.0) | 1.1 (0.6–1.8)  | 0.7  |
|                                | CBNAAT     | 128 | 47 | (36.7) | 1.0            |      |
| <b>History of previous TB</b>  | Yes        | 138 | 53 | (38.4) | 1.4 (0.6–3.4)  | 0.4  |
|                                | No         | 15  | 4  | (26.7) | 1.0            |      |
| <b>HIV status</b>              | Negative   | 152 | 56 | (36.8) | 1.0            | 0.3  |
|                                | Positive   | 1   | 1  | (100)  | 2.7 (2.2–3.3)  |      |
| <b>Diabetes</b>                | Yes        | 5   | 3  | (60.0) | 1.6 (0.8–3.5)  | 0.3  |
|                                | No         | 148 | 54 | (36.5) | 1.0            |      |
| <b>Severe adverse reaction</b> | Yes        | 51  | 15 | (29.4) | 0.7 (0.4–1.2)  | 0.2  |
|                                | No         | 102 | 42 | (41.2) |                |      |

RR: Relative Risk; DR-TB: Drug Resistant Tuberculosis; CBNAAT: Cartridge Based Nucleic Amplification Test; HIV: Human Immunodeficiency Virus.

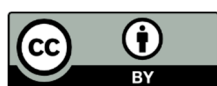

© 2020 by the authors. Submitted for possible open access publication under the terms and conditions of the Creative Commons Attribution (CC BY) license (<http://creativecommons.org/licenses/by/4.0/>).
